# Supplementary material for: Microencapsulated IL-12 Drives Genital Tract Immune Responses to Intranasal Gonococcal Outer Membrane Vesicle Vaccine and Induces Resistance to Vaginal Infection with Diverse Strains of Neisseria gonorrhoeae
Source: PubMed Central journal article supplement (PMC9942569; doi:10.1128/msphere.00388-22), 2022-12-20
Supplement: msphere.00388-22-s0001.pdf [file msphere.00388-22-s0001.pdf]

**Supplementary Table 1:** Cross-reactivity of sera from mice immunized i.n. with gonococcal OMVs against *N. gonorrhoeae* WHO reference strains. Results shown as % of IgG reactivity against each strain relative to reactivity against homologous immunizing strain (shown as 100%). Figures in **bold** are >50%.

| Immunization strain (OMV) | Reactivity against <i>N. gonorrhoeae</i> strain (porin type shown below each) |            |        |        |           |           |        |        |           |        |           |           |           |        |        |           |
|---------------------------|-------------------------------------------------------------------------------|------------|--------|--------|-----------|-----------|--------|--------|-----------|--------|-----------|-----------|-----------|--------|--------|-----------|
|                           | FA19                                                                          | FA1090     | WHO F  | WHO G  | WHO K     | WHO L     | WHO M  | WHO N  | WHO O     | WHO P  | WHO U     | WHO V     | WHO W     | WHO X  | WHO Y  | WHO Z     |
|                           | PorB1a                                                                        | PorB1b     | PorB1a | PorB1a | PorB1b    | PorB1b    | PorB1b | PorB1a | PorB1b    | PorB1b | PorB1b    | PorB1b    | PorB1b    | PorB1b | PorB1b | PorB1b    |
| FA19                      | <b>100</b>                                                                    | 41         | 32     | 40     | <b>69</b> | <b>54</b> | 42     | 43     | 40        | 48     | <b>63</b> | 45        | <b>50</b> | 36     | 33     | <b>71</b> |
| FA1090                    | NT                                                                            | <b>100</b> | 45     | 40     | <b>70</b> | <b>59</b> | 43     | 40     | <b>62</b> | 25     | 35        | <b>57</b> | 49        | 23     | 42     | 37        |

NT: not tested
