# Supplementary material for: Microencapsulated IL-12 Drives Genital Tract Immune Responses to Intranasal Gonococcal Outer Membrane Vesicle Vaccine and Induces Resistance to Vaginal Infection with Diverse Strains of Neisseria gonorrhoeae
Source: PubMed Central journal article supplement (PMC9942569; doi:10.1128/msphere.00388-22), 2022-12-20
Supplement: msphere.00388-22-s0002.pdf [file msphere.00388-22-s0002.pdf]

**Supplementary Fig. 1**

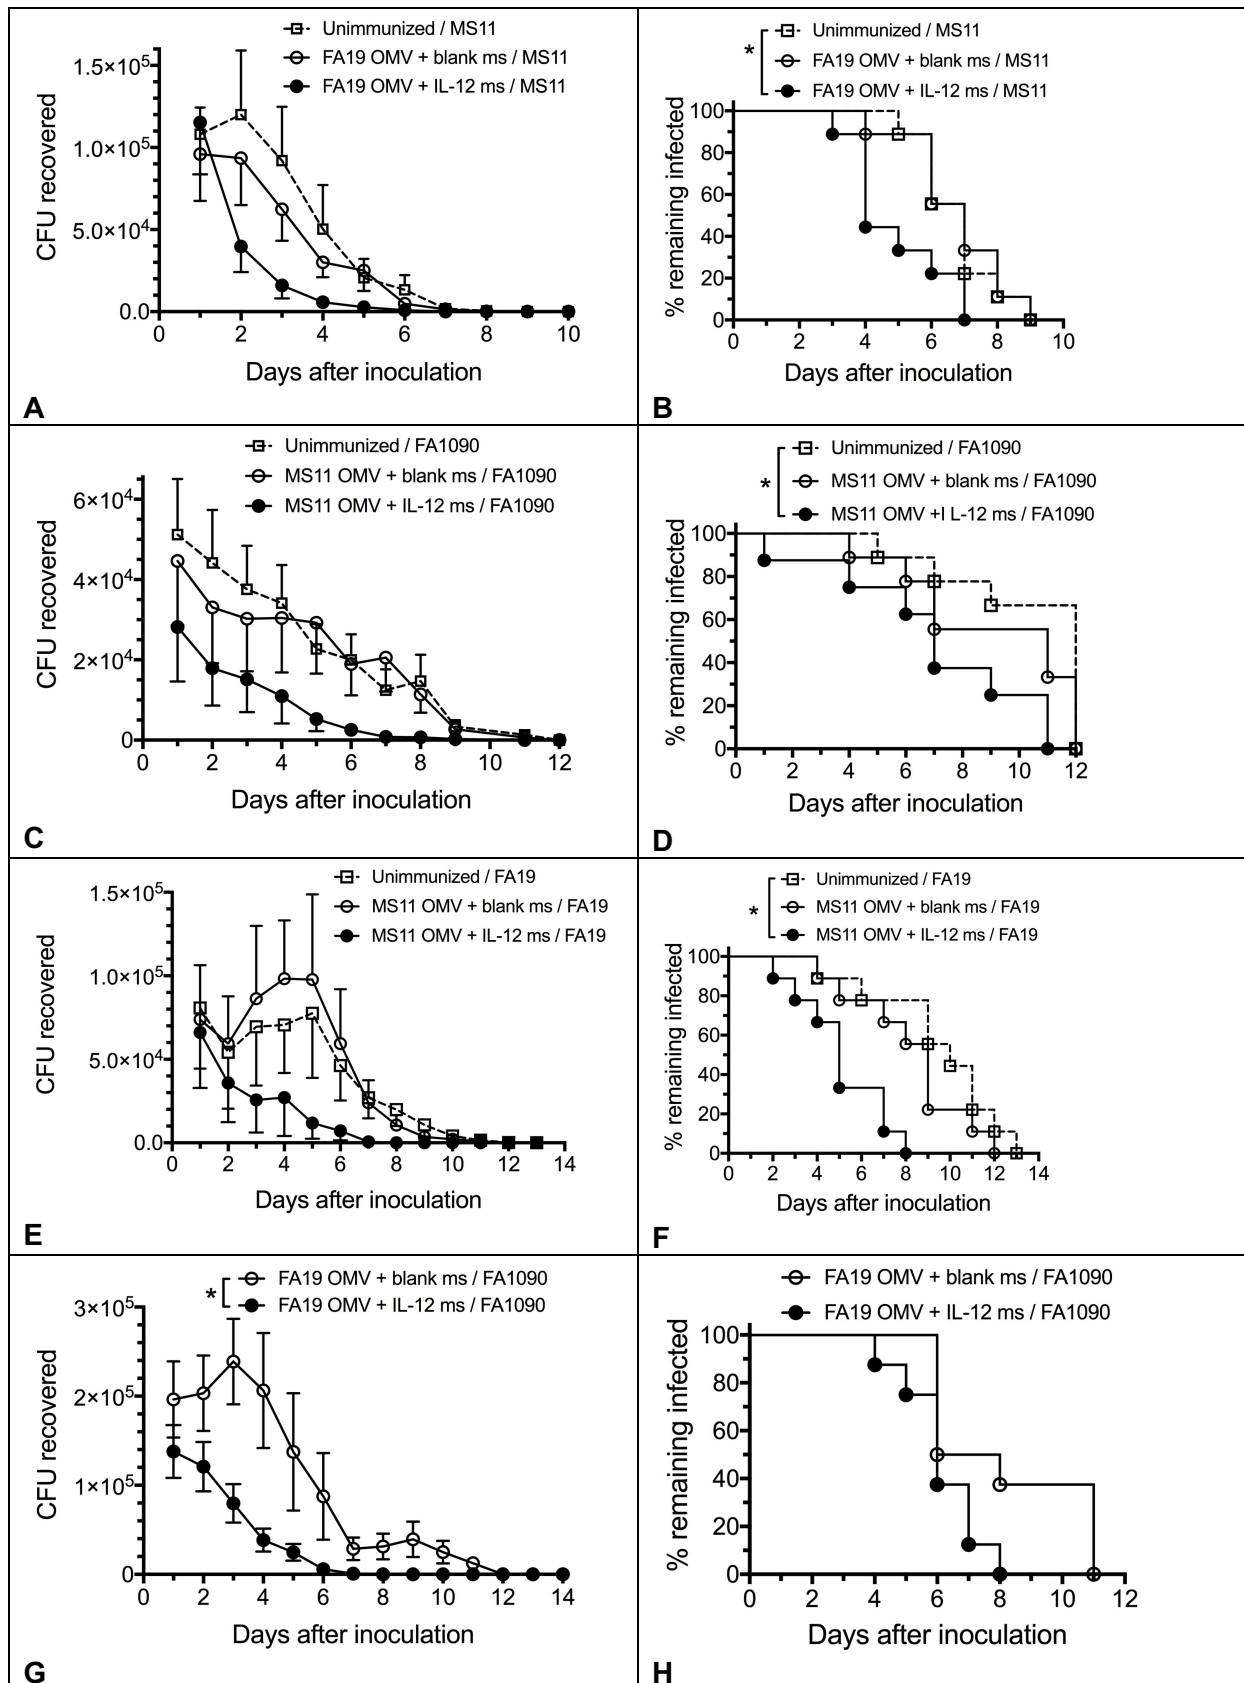

**Supplementary Fig. 1:** Cross-protection against heterologous strains of *N. gonorrhoeae* induced by i.n. immunization with various strains of gonococcal LiAcOMV plus IL-12 ms.

**A, B:** Immunization with FA19 LiAcOMV plus IL-12 ms or blank ms, challenged with MS11 (N=9). \*  $P = 0.0230$  (Kaplan-Meier, log-rank test).

**C, D:** Immunization with MS11 LiAcOMV plus IL-12 ms or blank ms, challenged with FA1090 (N=8/9). \*  $P < 0.01$  (Kaplan-Meier, log-rank test).

**E, F:** Immunization with MS11 LiAcOMV plus IL-12 ms or blank ms, challenged with FA19 (N=9). \*  $P = 0.0120$  (Kaplan-Meier, log-rank test).

**G, H:** Immunization with FA19 LiAcOMV plus IL-12 ms or blank ms, challenged with FA1090 (N=9). \*  $P < 0.02$  (2-way ANOVA).
